# Supplementary material for: Identification of QTL for resistance to Mediterranean corn borer in a maize tropical line to improve temperate germplasm
Source: BMC Plant Biol. 2015 Nov 4;15:265. doi: 10.1186/s12870-015-0652-9 (PMC4632334; doi:10.1186/s12870-015-0652-9)
Supplement: Additional file 1: — Phenotypic data of a RIL population derived from B73 × CML103. Data set containing the result of the evaluation of resistance and agronomic traits in two year with two replications per year at Pontevedra, Spain. (XLSX 73 kb) [file 12870_2015_652_MOESM1_ESM.xlsx]

## Sheet: Additional file 2
Identification of QTL for resistance to Mediterranean corn borer in a maize tropical line to improve temperate germplasm
LF Samayoa1, RA Malvar1, MD McMullen2, A Butrón1
1Misión Biológica de Galicia, Spanish National Research Council (CSIC), P.O. Box 28, 36080 Pontevedra, Spain.
2Plant Sciences Research Unit, USDA-Agricultural Research Service; and Division of Plant Sciences, University of Missouri, Columbia, MO, 65211, USA – retired.
Corresponding author: Luis Fernando Samayoa (Misión Biológica de Galicia-CSIC)
E.mail: fsamayoa@mbg.csic.es
Year	Location	Plot	Block	Replication	RIL	Stem_lodging	Days_to_Silking	Yield	Plant_height	Tunnel_length	Kernel_resist	Shank_resist	Stalk_damaged
2012	Pontevedra	1001	1	1	Z002E0136	0	92	1.96	177	18.25	9	9	10.3107
2012	Pontevedra	1002	1	1	Z002E0002	0	90	1.52	206	28.6	9	9	13.8835
2012	Pontevedra	1003	1	1	Z002E0181	0	93	4.62	209	34.6	9	9	16.555
2012	Pontevedra	1004	1	1	Z002E0144	0	91	0.9	210	63.5	6.66667	7.66667	30.2381
2012	Pontevedra	1005	1	1	Z002E0186	0	89	5.45	192	30.2	9	9	15.7292
2012	Pontevedra	1006	1	1	Z002E0111	0	93	3.32	246	23.2	9	9	9.4309
2012	Pontevedra	1007	1	1	Z002E0006	0	92	3.76	244	25	9	9	10.2459
2012	Pontevedra	1008	1	1	Z002E0062	0	95	2.15	199	15.6	9	9	7.8392
2012	Pontevedra	1009	1	1	Z002E0137	0	90	4.2	177	10.6	7.8	8.2	5.9887
2012	Pontevedra	1010	1	1	Z002E0120	0	95	2.78	196	10.5	8.8	8.8	5.3571
2012	Pontevedra	1011	1	1	Z002E0163	0	87	3.16	216	13	9	9	6.0185
2012	Pontevedra	1012	1	1	Z002E0199	0	89	4.76	191	8.75	9	9	4.5812
2012	Pontevedra	1013	1	1	Z002E0045	0	89	5.87	201	6.8	9	9	3.3831
2012	Pontevedra	1014	2	1	Z002E0077	0	89	2.74	226	15.6	9	8.4	6.9027
2012	Pontevedra	1015	2	1	Z002E0055	0	91	3.82	213	12.4	9	9	5.8216
2012	Pontevedra	1016	2	1	Z002E0029	0	86	4.47	193	19.2	8.25	8.75	9.9482
2012	Pontevedra	1017	2	1	Z002E0030	0	87	3.38	209	30.4	8.4	9	14.5455
2012	Pontevedra	1018	2	1	Z002E0182	0	87	5.4	232	42	7.8	7.8	18.1034
2012	Pontevedra	1019	2	1	Z002E0162	0	88	3.18	166	21	9	9	12.6506
2012	Pontevedra	1020	2	1	Z002E0010	30	90	1.83	182	23.8	8.4	8.6	13.0769
2012	Pontevedra	1021	2	1	Z002E0070	0	100	2.16	193	14.4	9	9	7.4611
2012	Pontevedra	1022	2	1	Z002E0004	0	90	2.41	198	22.8	9	9	11.5152
2012	Pontevedra	1023	2	1	Z002E0167	0	89	2.69	203	20.8	9	9	10.2463
2012	Pontevedra	1024	2	1	Z002E0197	0	90	3.06	216	31.6	8.4	8.8	14.6296
2012	Pontevedra	1025	2	1	Z002E0102	0	90	1.18	162	16	7.5	7	9.8765
2012	Pontevedra	1026	2	1	Z002E0125	0	87	5.31	231	29.4	8.6	9	12.7273
2012	Pontevedra	1027	3	1	Z002E0049	0	91	2.87	193	29.6	8.75	8.75	15.3368
2012	Pontevedra	1028	3	1	Z002E0037	0	90	6.79	225	18.4	7.8	7.4	8.1778
2012	Pontevedra	1029	3	1	Z002E0013	0	96	1.49	179	22	7.75	9	12.2905
2012	Pontevedra	1030	3	1	Z002E0065	0	96	1.6	218	27.8	7.6	6.5	12.7523
2012	Pontevedra	1031	3	1	Z002E0185	18.1818	92	2.52	174	35	9	9	20.1149
2012	Pontevedra	1032	3	1	Z002E0025	0	92	1.45	188	19	7.8	7	10.1064
2012	Pontevedra	1033	3	1	Z002E0018	0	97	0.26	157	40.75	6.33333	8	25.9554
2012	Pontevedra	1034	3	1	Z002E0053	0	104	0.81	213	35	7	8.5	16.4319
2012	Pontevedra	1035	3	1	Z002E0107	21.4286	90	2.51	201	40.2	8.4	8.2	20
2012	Pontevedra	1036	3	1	Z002E0179	0	92	1.76	179	40.8	8.8	9	22.7933
2012	Pontevedra	1037	3	1	Z002E0168	0	102	1.23	196	36.8	7.4	8.6	18.7755
2012	Pontevedra	1038	3	1	Z002E0078	18.1818	88	1.99	185	15.2	8	8.8	8.2162
2012	Pontevedra	1039	3	1	Z002E0080	0	96	2.9	185	21.6	8	8.6	11.6757
2012	Pontevedra	1040	4	1	Z002E0161	0	90	0.75	232	34	9	9	14.6552
2012	Pontevedra	1041	4	1	Z002E0086	0	89	2.76	186	16.2	8.8	9	8.7097
2012	Pontevedra	1042	4	1	Z002E0075	0	92	3.53	188	17.6	9	9	9.3617
2012	Pontevedra	1043	4	1	Z002E0129	0	90	2.11	190	37.8	7.2	8.8	19.8947
2012	Pontevedra	1044	4	1	Z002E0142	0	86	10.02	278	13.75	8.6	9	4.946
2012	Pontevedra	1045	4	1	Z002E0114	0	95	4.27	217	47.8	8	8.6	22.0276
2012	Pontevedra	1046	4	1	Z002E0052	0	93	3.94	233	28.25	9	7.6	12.1245
2012	Pontevedra	1047	4	1	Z002E0109	23.0769	91	1.89	206	28.8	8	6.8	13.9806
2012	Pontevedra	1048	4	1	Z002E0105	0	90	5.07	208.75	24.8	8.4	7.2	11.8802
2012	Pontevedra	1049	4	1	CML103	0	99	3.72	221	32	8.8	9	14.4796
2012	Pontevedra	1050	4	1	Z002E0050	0	91	2.21	170	34	8.6	9	20
2012	Pontevedra	1051	4	1	Z002E0097	0	97	1.11	193	32.4	8	7.6	16.7876
2012	Pontevedra	1052	4	1	Z002E0175	0	95	2.04	217	40.4	7.2	8.4	18.6175
2012	Pontevedra	1053	5	1	Z002E0131	0	93	2.34	213	48.4	7	8	22.723
2012	Pontevedra	1054	5	1	Z002E0036	0	92	1.41	195	44	4.5	8	22.5641
2012	Pontevedra	1055	5	1	Z002E0165	0	94	0.92	177	30	8.8	9	16.9492
2012	Pontevedra	1056	5	1	Z002E0174	0	90	12.04	215	14.8	8.4	9	6.8837
2012	Pontevedra	1057	5	1	Z002E0124	25	95	1.15	162	16	7.75	9	9.8765
2012	Pontevedra	1058	5	1	Z002E0123	0	97	0.45	114	12	.	.	10.5263
2012	Pontevedra	1059	5	1	Z002E0143	0	101	1.25	186	16.75	8.5	9	9.0054
2012	Pontevedra	1060	5	1	Z002E0101	0	102	0.64	170	20.4	8	7	12
2012	Pontevedra	1061	5	1	Z002E0146	0	99	1.45	186	16.6	8.2	8.6	8.9247
2012	Pontevedra	1062	5	1	Z002E0063	0	94	1.17	153	23	5.6	4.6	15.0327
2012	Pontevedra	1063	5	1	B73	0	90	3.71	198	70.6	7.6	6	35.6566
2012	Pontevedra	1064	5	1	Z002E0200	0	90	3.66	190	25.6	8.8	9	13.4737
2012	Pontevedra	1065	5	1	Z002E0180	11.1111	90	2.13	217	19.5	9	9	8.9862
2012	Pontevedra	1066	6	1	Z002E0130	0	98	3.79	184	10.4	8.8	8.8	5.6522
2012	Pontevedra	1067	6	1	Z002E0191	0	95	3.76	226	21.4	8.5	9	9.469
2012	Pontevedra	1068	6	1	Z002E0012	0	94	3.66	207	36	7.8	7.2	17.3913
2012	Pontevedra	1069	6	1	Z002E0195	0	101	0.91	179	11.6	9	9	6.4804
2012	Pontevedra	1070	6	1	Z002E0014	0	89	4.1	184	19	9	9	10.3261
2012	Pontevedra	1071	6	1	Z002E0092	28.5714	90	2.54	196	19	6.6	6	9.6939
2012	Pontevedra	1072	6	1	Z002E0169	0	99	1.95	203	9	8.2	9	4.4335
2012	Pontevedra	1073	6	1	Z002E0074	0	97	1.93	216	35	7.2	8.2	16.2037
2012	Pontevedra	1074	6	1	Z002E0081	0	104	1.98	198	28.4	8.2	9	14.3434
2012	Pontevedra	1075	6	1	Z002E0151	.	.	.	.	.	.	.	.
2012	Pontevedra	1076	6	1	Z002E0033	0	90	2.88	218	54.6	7.5	8.25	25.0459
2012	Pontevedra	1077	6	1	Z002E0154	0	88	6.45	213	33.6	7.6	8	15.7746
2012	Pontevedra	1078	6	1	Z002E0158	0	94	2.56	190	27	7.2	8.4	14.2105
2012	Pontevedra	1079	7	1	Z002E0156	0	92	4.27	186	16.2	8.5	9	8.7097
2012	Pontevedra	1080	7	1	Z002E0048	0	90	2.19	193	13.6	8.8	8.8	7.0466
2012	Pontevedra	1081	7	1	Z002E0057	0	95	1.79	239	28.4	7.75	9	11.8828
2012	Pontevedra	1082	7	1	Z002E0011	0	91	3.2	203	28.8	6.5	6.25	14.1872
2012	Pontevedra	1083	7	1	Z002E0135	9.09091	97	1.55	183	23.4	8.4	8	12.7869
2012	Pontevedra	1084	7	1	Z002E0073	0	94	3.91	203	18.6	9	9	9.1626
2012	Pontevedra	1085	7	1	Z002E0187	0	100	1.37	207	6.6	7	8.8	3.1884
2012	Pontevedra	1086	7	1	Z002E0032	0	93	0.88	197	19.4	8.8	9	9.8477
2012	Pontevedra	1087	7	1	Z002E0103	0	102	1	153	19.8	8	8.5	12.9412
2012	Pontevedra	1088	7	1	Z002E0140	7.69231	95	2.71	215	29.2	8.8	8.8	13.5814
2012	Pontevedra	1089	7	1	Z002E0106	0	107	0.3	169	21	9	9	12.426
2012	Pontevedra	1090	7	1	Z002E0193	0	86	10.39	232	21.2	8	9	9.1379
2012	Pontevedra	1091	7	1	Z002E0188	0	90	1.57	208	42	8.66667	8.66667	20.1923
2012	Pontevedra	1092	8	1	Z002E0005	9.09091	94	2.87	197	30.6	9	8.4	15.533
2012	Pontevedra	1093	8	1	Z002E0051	66.6667	95	1.35	206	22.25	8.5	9	10.801
2012	Pontevedra	1094	8	1	Z002E0022	0	98	3.67	238	32.6	7.75	8.5	13.6975
2012	Pontevedra	1095	8	1	Z002E0116	11.1111	98	2.89	221	33.2	7.4	7.4	15.0226
2012	Pontevedra	1096	8	1	Z002E0015	0	95	3.76	219	46.8	9	9	21.3699
2012	Pontevedra	1097	8	1	Z002E0184	0	93	3.87	214	32	8.8	9	14.9533
2012	Pontevedra	1098	8	1	Z002E0003	0	90	2.55	197	21.6	9	7.4	10.9645
2012	Pontevedra	1099	8	1	Z002E0176	0	90	3.62	230	27.8	8.4	8.4	12.087
2012	Pontevedra	1100	8	1	Z002E0166	0	90	3.56	188	35.4	6.6	7.4	18.8298
2012	Pontevedra	1101	8	1	Z002E0118	0	93	5.13	252	27.6	8.8	9	10.9524
2012	Pontevedra	1102	8	1	Z002E0095	0	90	2.26	208	32.8	8.8	9	15.7692
2012	Pontevedra	1103	8	1	Z002E0189	18.1818	103	0.76	172	38.6	.	.	22.4419
2012	Pontevedra	1104	8	1	Z002E0087	0	90	2.91	205	54.8	8.2	9	26.7317
2012	Pontevedra	1105	9	1	Z002E0138	9.09091	90	2.07	198	29.4	7.6	8.4	14.8485
2012	Pontevedra	1106	9	1	Z002E0059	0	90	3.8	207	54	8	8	26.087
2012	Pontevedra	1107	9	1	Z002E0148	0	95	2.86	205	36	8.4	9	17.561
2012	Pontevedra	1108	9	1	Z002E0091	9.09091	95	1.89	201	49.4	7.4	8.8	24.5771
2012	Pontevedra	1109	9	1	Z002E0066	0	101	0.8	169	35	8	8.25	20.7101
2012	Pontevedra	1110	9	1	Z002E0122	0	100	0.62	176	32.2	8.66667	9	18.2955
2012	Pontevedra	1111	9	1	Z002E0072	7.69231	92	1.03	186	20	8.5	6.75	10.7527
2012	Pontevedra	1112	9	1	Z002E0119	0	92	3.12	204	18.6	7.6	8.6	9.1176
2012	Pontevedra	1113	9	1	Z002E0088	0	95	2.59	187	10.2	9	9	5.4545
2012	Pontevedra	1114	9	1	Z002E0021	0	91	2.72	229	16.4	9	9	7.1616
2012	Pontevedra	1115	9	1	Z002E0084	7.14286	97	2.66	239	37.8	7.8	8.4	15.8159
2012	Pontevedra	1116	9	1	Z002E0112	0	99	1.56	230	37.6	8.25	8.75	16.3478
2012	Pontevedra	1117	9	1	Z002E0016	0	88	2.78	202	43.6	9	9	21.5842
2012	Pontevedra	1118	10	1	Z002E0128	0	94	2.32	242	64.8	6	5.4	26.7769
2012	Pontevedra	1119	10	1	Z002E0038	20	94	2.63	223	46.75	9	8.75	20.9641
2012	Pontevedra	1120	10	1	Z002E0183	0	91	5.41	196	32.2	9	9	16.4286
2012	Pontevedra	1121	10	1	Z002E0164	0	96	2.37	215	62.6	7.2	8.2	29.1163
2012	Pontevedra	1122	10	1	Z002E0069	7.14286	92	1.81	176	33.2	8.8	8.2	18.8636
2012	Pontevedra	1123	10	1	Z002E0019	0	94	3.82	247	15	8.6	9	6.0729
2012	Pontevedra	1124	10	1	Z002E0020	0	90	4.26	241	17	8.2	9	7.0539
2012	Pontevedra	1125	10	1	Z002E0096	8.33333	94	4.29	256	66.6	8.8	9	26.0156
2012	Pontevedra	1126	10	1	Z002E0178	0	90	4.11	214	13.4	9	9	6.2617
2012	Pontevedra	1127	10	1	Z002E0141	14.2857	91	4.49	217	7.4	9	9	3.4101
2012	Pontevedra	1128	10	1	Z002E0060	0	92	0.57	173	6.2	9	9	3.5838
2012	Pontevedra	1129	10	1	Z002E0110	9.09091	91	3.65	221	15.2	8.6	9	6.8778
2012	Pontevedra	1130	10	1	Z002E0083	0	89	3.24	204	18.4	9	8.8	9.0196
2012	Pontevedra	1131	11	1	Z002E0117	7.69231	90	5.08	246	37.6	8.8	7.2	15.2846
2012	Pontevedra	1132	11	1	Z002E0157	0	90	4.29	206	17.2	8.5	9	8.3495
2012	Pontevedra	1133	11	1	Z002E0172	0	93	3.72	237	15	7	8.2	6.3291
2012	Pontevedra	1134	11	1	Z002E0056	0	90	3.81	210	29	8.2	8.4	13.8095
2012	Pontevedra	1135	11	1	Z002E0160	0	86	5.03	255	31	9	9	12.1569
2012	Pontevedra	1136	11	1	Z002E0150	16.6667	86	4.81	268	24	9	9	8.9552
2012	Pontevedra	1137	11	1	Z002E0043	0	92	3.3	228	23.75	7.66667	8.33333	10.4167
2012	Pontevedra	1138	11	1	Z002E0076	0	90	4.47	261	35.6	8.5	9	13.6398
2012	Pontevedra	1139	11	1	Z002E0198	0	89	4.29	228	25.6	8.8	9	11.2281
2012	Pontevedra	1140	11	1	Z002E0028	0	96	3.57	258	28.4	9	9	11.0078
2012	Pontevedra	1141	11	1	Z002E0079	7.69231	90	2.26	205	26.4	7.6	5.8	12.878
2012	Pontevedra	1142	11	1	Z002E0155	0	96	4.49	226	40.2	8.6	9	17.7876
2012	Pontevedra	1143	11	1	Z002E0042	0	86	4.87	248	25.4	8.6	5.8	10.2419
2012	Pontevedra	1144	12	1	Z002E0132	0	92	2.6	264	58.6	8	7.6	22.197
2012	Pontevedra	1145	12	1	Z002E0058	0	91	2.04	209	45.8	8.8	7	21.9139
2012	Pontevedra	1146	12	1	Z002E0082	0	90	3.31	228	51.6	8.8	8.4	22.6316
2012	Pontevedra	1147	12	1	Z002E0194	0	92	4.85	247	48	8.6	9	19.4332
2012	Pontevedra	1148	12	1	Z002E0149	0	90	3.97	206	26	8.2	8.6	12.6214
2012	Pontevedra	1149	12	1	Z002E0152	16.6667	89	2.16	186	12	9	9	6.4516
2012	Pontevedra	1150	12	1	Z002E0093	0	90	3.27	200	17.4	8.6	9	8.7
2012	Pontevedra	1151	12	1	Z002E0127	0	96	3.17	219	18.2	9	9	8.3105
2012	Pontevedra	1152	12	1	Z002E0104	0	96	2.9	193	37.25	8.6	9	19.3005
2012	Pontevedra	1153	12	1	Z002E0147	0	86	5.47	229	31.5	8.5	9	13.7555
2012	Pontevedra	1154	12	1	Z002E0046	0	90	3.43	204	23	8.75	9	11.2745
2012	Pontevedra	1155	12	1	Z002E0064	0	96	1.84	222	29.2	8.75	8.5	13.1532
2012	Pontevedra	1156	12	1	Z002E0139	0	97	3.92	246	28.4	8.2	9	11.5447
2012	Pontevedra	1157	13	1	Z002E0196	0	89	2.59	231	17.6	9	8.6	7.619
2012	Pontevedra	1158	13	1	Z002E0098	0	92	2.88	225	39.5	8.25	8.25	17.5556
2012	Pontevedra	1159	13	1	Z002E0100	16.6667	96	0.8	167	21.4	9	9	12.8144
2012	Pontevedra	1160	13	1	Z002E0153	0	102	1.2	231	18.8	9	9	8.1385
2012	Pontevedra	1161	13	1	Z002E0041	0	93	2.91	243	39	9	9	16.0494
2012	Pontevedra	1162	13	1	Z002E0171	0	94	3.66	247	11.4	8.8	9	4.6154
2012	Pontevedra	1163	13	1	Z002E0044	0	99	3.92	224	13.4	9	8.6	5.9821
2012	Pontevedra	1164	13	1	Z002E0159	0	97	1.83	233	19.3333	8.66667	9	8.2976
2012	Pontevedra	1165	13	1	Z002E0108	0	91	4.3	231	5.8	8.4	9	2.5108
2012	Pontevedra	1166	13	1	Z002E0085	7.69231	94	3.55	195	18.2	9	8.8	9.3333
2012	Pontevedra	1167	13	1	Z002E0121	0	95	3.66	220	20.2	9	9	9.1818
2012	Pontevedra	1168	13	1	Z002E0040	0	93	2.54	207	35.2	8.4	7.8	17.0048
2012	Pontevedra	1169	13	1	Z002E0047	0	97	2.92	210	49	8.5	7.5	23.3333
2012	Pontevedra	1170	14	1	Z002E0170	20	97	2.9	244	51.25	8	9	21.0041
2012	Pontevedra	1171	14	1	Z002E0113	8.33333	92	3.36	235	52.4	9	8.4	22.2979
2012	Pontevedra	1172	14	1	Z002E0023	8.33333	94	3.13	230	44.25	7.66667	8.33333	19.2391
2012	Pontevedra	1173	14	1	Z002E0145	0	97	4.15	228	30.6	9	9	13.4211
2012	Pontevedra	1174	14	1	Z002E0007	0	90	3.09	203	26	8.8	8.6	12.8079
2012	Pontevedra	1175	14	1	Z002E0133	0	93	4.22	184	32	9	9	17.3913
2012	Pontevedra	1176	14	1	Z002E0090	0	87	5.09	226	43	7.2	6.8	19.0265
2012	Pontevedra	1177	14	1	Z002E0094	7.69231	90	3.56	200	30	9	8.6	15
2012	Pontevedra	1178	14	1	Z002E0009	0	96	2.39	227	12	8.75	9	5.2863
2012	Pontevedra	1179	14	1	Z002E0039	0	92	1.78	193	14.8	8.4	7.4	7.6684
2012	Pontevedra	1180	14	1	Z002E0134	0	90	3.91	176	17.5	8	8	9.9432
2012	Pontevedra	1181	14	1	Z002E0068	0	93	1.47	197	45.6	8.2	8.4	23.1472
2012	Pontevedra	1182	14	1	Z002E0008	0	93	5.22	242	35.4	8.6	8.8	14.6281
2012	Pontevedra	2001	1	2	Z002E0175	0	95	3.09	240	42.2	8.4	8	17.5833
2012	Pontevedra	2002	1	2	Z002E0198	0	89	5.17	212	32.2	8.4	9	15.1887
2012	Pontevedra	2003	1	2	Z002E0057	12.5	95	2.13	233	41.5	9	9	17.8112
2012	Pontevedra	2004	1	2	Z002E0182	0	87	5.14	237	51.25	8	7.4	21.6245
2012	Pontevedra	2005	1	2	Z002E0021	0	95	2.79	204	31.6	8.8	8.8	15.4902
2012	Pontevedra	2006	1	2	Z002E0146	0	99	2.6	214	34.8	8.2	9	16.2617
2012	Pontevedra	2007	1	2	Z002E0049	0	95	3.52	198	21.4	9	9	10.8081
2012	Pontevedra	2008	1	2	Z002E0189	18.1818	93	1.38	172	11.6	7.25	6.75	6.7442
2012	Pontevedra	2009	1	2	Z002E0045	0	88	5.23	224	53.8	6.4	4.8	24.0179
2012	Pontevedra	2010	1	2	Z002E0020	0	91	3.37	202	25.2	8	8.2	12.4752
2012	Pontevedra	2011	1	2	Z002E0085	0	92	3.2	202	49.4	8.2	8.6	24.4554
2012	Pontevedra	2012	1	2	Z002E0152	8.33333	93	1.07	142	28.5	4.66667	6.66667	20.0704
2012	Pontevedra	2013	1	2	Z002E0094	0	92	2.52	190	23.8	5.8	7	12.5263
2012	Pontevedra	2014	2	2	Z002E0083	0	91	2.6	178	13.8	9	9	7.7528
2012	Pontevedra	2015	2	2	Z002E0055	0	91	3.65	239	26.6	9	9	11.1297
2012	Pontevedra	2016	2	2	Z002E0108	8.33333	90	5.38	211	45.6	8.5	8.75	21.6114
2012	Pontevedra	2017	2	2	Z002E0016	75	88	1.94	197	12.8	8	9	6.4975
2012	Pontevedra	2018	2	2	Z002E0114	0	93	3.95	184	34.6	7.8	8.8	18.8043
2012	Pontevedra	2019	2	2	Z002E0136	0	93	0.65	153.75	22	.	.	14.3089
2012	Pontevedra	2020	2	2	Z002E0087	0	99	3.3	185	20.5	8.8	7.4	11.0811
2012	Pontevedra	2021	2	2	Z002E0158	25	103	0.78	131	16.75	9	9	12.7863
2012	Pontevedra	2022	2	2	Z002E0073	0	93	3.41	210	25.8	9	9	12.2857
2012	Pontevedra	2023	2	2	Z002E0117	7.69231	92	4.36	229	43.5	9	9	18.9956
2012	Pontevedra	2024	2	2	Z002E0068	0	93	1.74	211	57.6	7.5	8.5	27.2986
2012	Pontevedra	2025	2	2	Z002E0018	0	88	1.96	209	50	7	7.4	23.9234
2012	Pontevedra	2026	2	2	Z002E0058	0	91	1.58	154	19.2	9	9	12.4675
2012	Pontevedra	2027	3	2	Z002E0149	0	87	2.85	203	25	8.4	9	12.3153
2012	Pontevedra	2028	3	2	Z002E0081	0	101	2.3	204	.	.	.	.
2012	Pontevedra	2029	3	2	Z002E0140	21.4286	97	2.51	218	16.75	9	9	7.6835
2012	Pontevedra	2030	3	2	Z002E0159	10	93	1.65	218	40.6	7.25	8.5	18.6239
2012	Pontevedra	2031	3	2	Z002E0113	0	92	1.74	192	48.8	8	6.8	25.4167
2012	Pontevedra	2032	3	2	Z002E0102	0	88	2.69	213	29.6	8.8	9	13.8967
2012	Pontevedra	2033	3	2	Z002E0084	0	91	3.5	254	32.8	9	8.5	12.9134
2012	Pontevedra	2034	3	2	Z002E0056	0	88	4.23	198	49.5	8.8	8.2	25
2012	Pontevedra	2035	3	2	Z002E0166	7.14286	88	3.69	196	16.4	8.4	8.2	8.3673
2012	Pontevedra	2036	3	2	Z002E0063	25	93	2.31	224	50.25	6.25	6.33333	22.433
2012	Pontevedra	2037	3	2	Z002E0105	0	89	3.75	234	30.5	9	9	13.0342
2012	Pontevedra	2038	3	2	Z002E0179	0	93	4.27	236	43.2	8.8	9	18.3051
2012	Pontevedra	2039	3	2	Z002E0178	0	88	4.43	215	35.2	8.6	9	16.3721
2012	Pontevedra	2040	4	2	Z002E0150	0	88	4.14	180	35.2	9	9	19.5556
2012	Pontevedra	2041	4	2	Z002E0097	0	94	2.19	219	18.8	9	9	8.5845
2012	Pontevedra	2042	4	2	Z002E0186	0	90	6.26	210	10	9	9	4.7619
2012	Pontevedra	2043	4	2	Z002E0180	30	90	2.79	245	16	9	9	6.5306
2012	Pontevedra	2044	4	2	Z002E0005	0	90	4.71	219	35.4	8.8	9	16.1644
2012	Pontevedra	2045	4	2	Z002E0119	0	92	2.85	233	52.6	8	8.2	22.5751
2012	Pontevedra	2046	4	2	Z002E0047	0	93	4.45	258	56.8	8.2	9	22.0155
2012	Pontevedra	2047	4	2	Z002E0135	0	96	1.77	219	30	6.8	8.6	13.6986
2012	Pontevedra	2048	4	2	Z002E0023	7.69231	93	4.17	220	43.8	8.2	8.2	19.9091
2012	Pontevedra	2049	4	2	Z002E0128	0	94	2.94	238	33	8.25	9	13.8655
2012	Pontevedra	2050	4	2	Z002E0139	0	96	4.15	250	28.2	8.6	9	11.28
2012	Pontevedra	2051	4	2	Z002E0065	0	99	2.18	218	44.25	7.5	8.25	20.2982
2012	Pontevedra	2052	4	2	Z002E0033	0	93	4.33	240	25.4	9	9	10.5833
2012	Pontevedra	2053	5	2	Z002E0191	0	94	3.59	246	60.8	8	8.6	24.7154
2012	Pontevedra	2054	5	2	Z002E0116	10	98	2.3	236	27.8	9	9	11.7797
2012	Pontevedra	2055	5	2	Z002E0164	23.0769	99	1.93	221	30	8	8.66667	13.5747
2012	Pontevedra	2056	5	2	Z002E0167	0	89	4.35	218	17	8.6	8.4	7.7982
2012	Pontevedra	2057	5	2	Z002E0148	0	93	4.73	250	38.4	9	9	15.36
2012	Pontevedra	2058	5	2	Z002E0134	23.0769	89	1.92	178	24	8.2	8.8	13.4831
2012	Pontevedra	2059	5	2	Z002E0104	0	93	1.14	192	22.2	8	8.8	11.5625
2012	Pontevedra	2060	5	2	Z002E0079	0	95	3.16	206	54.4	8.6	9	26.4078
2012	Pontevedra	2061	5	2	Z002E0044	0	97	4.42	232	30.5	9	9	13.1466
2012	Pontevedra	2062	5	2	Z002E0187	20	94	3.12	243	13.4	9	9	5.5144
2012	Pontevedra	2063	5	2	Z002E0165	0	93	3.43	258	54.2	8.8	8.8	21.0078
2012	Pontevedra	2064	5	2	Z002E0144	0	94	1.98	236	33	8.8	9	13.9831
2012	Pontevedra	2065	5	2	Z002E0185	14.2857	91	4.15	215	29	9	9	13.4884
2012	Pontevedra	2066	6	2	Z002E0131	15.3846	94	3.55	250	8.4	8.8	9	3.36
2012	Pontevedra	2067	6	2	Z002E0121	7.69231	93	4.39	251	12.8	9	9	5.0996
2012	Pontevedra	2068	6	2	Z002E0095	0	88	2.8	235	21.4	8.8	8.8	9.1064
2012	Pontevedra	2069	6	2	Z002E0042	0	88	4.31	238	27.4	8.6	8.6	11.5126
2012	Pontevedra	2070	6	2	Z002E0183	0	91	3.4	229	35	8.2	8.2	15.2838
2012	Pontevedra	2071	6	2	Z002E0161	0	88	4.09	256	44.8	8.6	9	17.5
2012	Pontevedra	2072	6	2	Z002E0193	0	86	5.32	268	20.6	9	8.6	7.6866
2012	Pontevedra	2073	6	2	Z002E0046	0	88	3.95	231	82.6	8.6	8.8	35.7576
2012	Pontevedra	2074	6	2	Z002E0125	0	90	5.72	245	32.2	8.4	7.6	13.1429
2012	Pontevedra	2075	6	2	Z002E0074	0	90	3.67	238	39.4	7.2	7.6	16.5546
2012	Pontevedra	2076	6	2	Z002E0137	8.33333	87	4.63	237	32.2	8	9	13.5865
2012	Pontevedra	2077	6	2	Z002E0088	0	91	3.31	205	17.4	8.2	8.8	8.4878
2012	Pontevedra	2078	6	2	Z002E0013	0	102	1.98	181	17.4	8	8.5	9.6133
2012	Pontevedra	2079	7	2	Z002E0002	0	93	1.09	198	15.8	8.66667	7.66667	7.9798
2012	Pontevedra	2080	7	2	Z002E0030	0	87	2.77	216	33.6	8	7.6	15.5556
2012	Pontevedra	2081	7	2	Z002E0050	0	88	2.55	208	14.8	9	8.4	7.1154
2012	Pontevedra	2082	7	2	Z002E0012	0	93	3.62	227	26	9	9	11.4537
2012	Pontevedra	2083	7	2	Z002E0059	0	87	4.65	240	25	8.8	9	10.4167
2012	Pontevedra	2084	7	2	Z002E0107	10	88	3.69	261	3	9	9	1.1494
2012	Pontevedra	2085	7	2	Z002E0170	0	89	2.24	253	37.2	7.5	7.25	14.7036
2012	Pontevedra	2086	7	2	Z002E0160	0	86	5.52	280	13	9	9	4.6429
2012	Pontevedra	2087	7	2	Z002E0041	7.69231	89	4.15	244	27.6	9	9	11.3115
2012	Pontevedra	2088	7	2	Z002E0048	9.09091	91	2.56	227	32.4	8.8	8.8	14.2731
2012	Pontevedra	2089	7	2	Z002E0069	0	91	2.34	178	38	8.25	7	21.3483
2012	Pontevedra	2090	7	2	Z002E0147	18.1818	86	3.42	221	25.8	8.5	9	11.6742
2012	Pontevedra	2091	7	2	Z002E0143	0	90	3.99	233	37.6	8.5	9	16.1373
2012	Pontevedra	2092	8	2	Z002E0138	0	87	1.25	195	36	7.75	9	18.4615
2012	Pontevedra	2093	8	2	Z002E0103	71.4286	95	0.5	166	52	3.4	2.6	31.3253
2012	Pontevedra	2094	8	2	Z002E0155	8.33333	93	3.12	208	42.6	8.4	8.8	20.4808
2012	Pontevedra	2095	8	2	Z002E0181	0	93	3.73	244	36.8	8.8	9	15.082
2012	Pontevedra	2096	8	2	Z002E0133	0	90	3.17	200	43	9	8.8	21.5
2012	Pontevedra	2097	8	2	Z002E0093	0	87	3.97	209	21.6	8.6	9	10.3349
2012	Pontevedra	2098	8	2	Z002E0038	16.6667	94	2.63	231	18	8	8.75	7.7922
2012	Pontevedra	2099	8	2	Z002E0151	0	89	2.59	231	13.2	8.6	9	5.7143
2012	Pontevedra	2100	8	2	Z002E0077	0	90	3.55	245	23.8	9	9	9.7143
2012	Pontevedra	2101	8	2	Z002E0174	0	88	6.95	256	16.2	8.6	9	6.3281
2012	Pontevedra	2102	8	2	Z002E0168	0	99	3.01	240	58.6	8.4	9	24.4167
2012	Pontevedra	2103	8	2	Z002E0184	8.33333	91	4.75	228	30.8	9	9	13.5088
2012	Pontevedra	2104	8	2	Z002E0109	18.1818	91	2.87	244	63	7.4	7.4	25.8197
2012	Pontevedra	2105	9	2	Z002E0043	0	93	2.26	219	37	8.75	9	16.895
2012	Pontevedra	2106	9	2	Z002E0199	0	88	3.87	206	46.4	7.2	8	22.5243
2012	Pontevedra	2107	9	2	Z002E0127	18.1818	95	2.95	227	32.6	8.33333	9	14.3612
2012	Pontevedra	2108	9	2	Z002E0090	8.33333	86	2.58	238	65.2	7.8	6.8	27.395
2012	Pontevedra	2109	9	2	Z002E0169	0	95	4.02	229	40.8	8.6	8.4	17.8166
2012	Pontevedra	2110	9	2	Z002E0022	0	98	3.28	240	70.6	8.6	9	29.4167
2012	Pontevedra	2111	9	2	Z002E0040	16.6667	100	0.81	210	49.2	8.2	9	23.4286
2012	Pontevedra	2112	9	2	Z002E0010	30	94	1.62	199	60.3333	6	8.5	30.3183
2012	Pontevedra	2113	9	2	Z002E0129	0	91	2.03	199	36.2	7.66667	8.66667	18.191
2012	Pontevedra	2114	9	2	Z002E0101	0	97	1.12	220	61.5	5.66667	8.66667	27.9545
2012	Pontevedra	2115	9	2	Z002E0032	9.09091	94	1.57	224	42.8	8.5	9	19.1071
2012	Pontevedra	2116	9	2	Z002E0080	10	88	2.86	204	38.5	7.25	8.75	18.8725
2012	Pontevedra	2117	9	2	Z002E0060	0	97	0.52	166	33.4	5	6.66667	20.1205
2012	Pontevedra	2118	10	2	Z002E0006	0	95	2.56	202	27.5	8.33333	9	13.6139
2012	Pontevedra	2119	10	2	Z002E0145	0	91	4.59	235	40	9	9	17.0213
2012	Pontevedra	2120	10	2	Z002E0070	0	104	2.68	224	32.8	8.8	8.8	14.6429
2012	Pontevedra	2121	10	2	Z002E0130	0	95	5.38	206	26.4	8.4	9	12.8155
2012	Pontevedra	2122	10	2	Z002E0200	0	89	3.16	196	38.2	7	8.2	19.4898
2012	Pontevedra	2123	10	2	Z002E0156	16.6667	93	2.86	192	27.2	7.6	8.2	14.1667
2012	Pontevedra	2124	10	2	Z002E0096	8.33333	95	3.58	253	48.6667	6	8.66667	19.2358
2012	Pontevedra	2125	10	2	Z002E0118	0	91	6.4	258	40	8.6	8.2	15.5039
2012	Pontevedra	2126	10	2	Z002E0100	0	98	.	208	29.4	7	8.66667	14.1346
2012	Pontevedra	2127	10	2	Z002E0052	0	91	1.25	234	40.5	8.5	9	17.3077
2012	Pontevedra	2128	10	2	Z002E0066	0	103	.	118	16.6667	.	.	14.1243
2012	Pontevedra	2129	10	2	Z002E0053	37.5	101	2.27	233	39.4	7.33333	6.33333	16.9099
2012	Pontevedra	2130	10	2	Z002E0076	9.09091	91	4.59	210	42.25	9	8.8	20.119
2012	Pontevedra	2131	11	2	Z002E0132	20	93	2.78	199	44	9	9	22.1106
2012	Pontevedra	2132	11	2	Z002E0120	0	94	2.57	202	26.2	9	9	12.9703
2012	Pontevedra	2133	11	2	Z002E0141	0	94	3.4	221	51.6	9	8.8	23.3484
2012	Pontevedra	2134	11	2	Z002E0039	8.33333	87	3	168	36.8	8	9	21.9048
2012	Pontevedra	2135	11	2	Z002E0014	0	92	2.85	192	37.2	8.25	8	19.375
2012	Pontevedra	2136	11	2	Z002E0157	23.0769	91	4.36	174	32.2	8	7.8	18.5057
2012	Pontevedra	2137	11	2	Z002E0153	14.2857	91	0.35	180	39.8	7	8.75	22.1111
2012	Pontevedra	2138	11	2	Z002E0112	0	98	2.32	195	28.8	6.25	8.66667	14.7692
2012	Pontevedra	2139	11	2	Z002E0011	0	95	1.73	183	37.2	6.6	7.2	20.3279
2012	Pontevedra	2140	11	2	Z002E0051	0	98	1.1	192	53.25	8.5	8.75	27.7344
2012	Pontevedra	2141	11	2	Z002E0036	8.33333	89	4.18	236	53	7.6	8.4	22.4576
2012	Pontevedra	2142	11	2	Z002E0162	0	90	3.25	170	52.2	7.8	7.8	30.7059
2012	Pontevedra	2143	11	2	Z002E0142	0	86	8.27	263	14.8	8.2	9	5.6274
2012	Pontevedra	2144	12	2	Z002E0064	22.2222	99	1.71	209	46.6	8.8	9	22.2967
2012	Pontevedra	2145	12	2	Z002E0078	41.6667	88	2.2	177	31.5	7.6	9	17.7966
2012	Pontevedra	2146	12	2	Z002E0004	0	88	3.24	220	52.6	8.6	8.8	23.9091
2012	Pontevedra	2147	12	2	Z002E0106	0	98	0.93	211.25	48	7.33333	9	22.7219
2012	Pontevedra	2148	12	2	Z002E0163	0	89	3.53	246	63.6	9	9	25.8537
2012	Pontevedra	2149	12	2	Z002E0086	0	91	3.42	210	28.6	9	8.8	13.619
2012	Pontevedra	2150	12	2	Z002E0154	15.3846	91	5.72	236	43.2	9	8.75	18.3051
2012	Pontevedra	2151	12	2	Z002E0123	0	90	2.07	197	37	8.2	9	18.7817
2012	Pontevedra	2152	12	2	Z002E0091	16.6667	93	1.99	216	64.25	7.75	8.75	29.7454
2012	Pontevedra	2153	12	2	Z002E0028	0	98	5.76	253	49.2	7.8	8.6	19.4466
2012	Pontevedra	2154	12	2	Z002E0008	0	96	4.39	237	48.4	8.8	8.6	20.4219
2012	Pontevedra	2155	12	2	Z002E0098	0	96	3.98	239	53.4	8.6	8.8	22.3431
2012	Pontevedra	2156	12	2	Z002E0176	7.69231	91	3.89	231	76.5	7.6	8.4	33.1169
2012	Pontevedra	2157	13	2	Z002E0111	18.1818	92	2.67	244	57.6667	7.6	9	23.6339
2012	Pontevedra	2158	13	2	Z002E0194	8.33333	94	5.38	248	73.8	8.8	8.8	29.7581
2012	Pontevedra	2159	13	2	Z002E0003	0	90	3.95	208	23.4	8.6	9	11.25
2012	Pontevedra	2160	13	2	B73	0	89	2.79	218	35.4	8.75	9	16.2385
2012	Pontevedra	2161	13	2	Z002E0092	11.1111	88	2.3	203	36	7.75	8.75	17.734
2012	Pontevedra	2162	13	2	Z002E0072	18.1818	94	1.03	181	25	9	9	13.8122
2012	Pontevedra	2163	13	2	Z002E0197	16.6667	89	3.58	231	39.3333	8.66667	7	17.0274
2012	Pontevedra	2164	13	2	CML103	0	99	4.03	224	45	9	8.6	20.0893
2012	Pontevedra	2165	13	2	Z002E0196	14.2857	89	2.12	205	46	8.75	9	22.439
2012	Pontevedra	2166	13	2	Z002E0019	8.33333	92	4.29	236	45.5	7.5	7.25	19.2797
2012	Pontevedra	2167	13	2	Z002E0025	8.33333	88	2.88	210	42.25	7.66667	8.66667	20.119
2012	Pontevedra	2168	13	2	Z002E0009	0	91	3.71	235	28	7.2	8.8	11.9149
2012	Pontevedra	2169	13	2	Z002E0172	0	91	4.86	260	62.8	8.2	8.4	24.1538
2012	Pontevedra	2170	14	2	Z002E0188	0	90	2.77	227	47.8	7.2	5.4	21.0573
2012	Pontevedra	2171	14	2	Z002E0122	25	90	2.52	220	36.4	8.5	9	16.5455
2012	Pontevedra	2172	14	2	Z002E0029	0	86	4.75	207	43.2	8.4	8.6	20.8696
2012	Pontevedra	2173	14	2	Z002E0195	0	94	2.98	210	32.6	8.25	9	15.5238
2012	Pontevedra	2174	14	2	Z002E0171	8.33333	90	4.39	256	56.25	8.75	8.75	21.9727
2012	Pontevedra	2175	14	2	Z002E0124	7.69231	93	3.75	237	61	8.8	8.8	25.7384
2012	Pontevedra	2176	14	2	Z002E0075	0	91	4.14	195	28	7.6	8.4	14.359
2012	Pontevedra	2177	14	2	Z002E0037	23.0769	89	4.28	254	40	8.6	8.6	15.748
2012	Pontevedra	2178	14	2	Z002E0015	0	91	2.22	223	51.4	7.6	8.6	23.0493
2012	Pontevedra	2179	14	2	Z002E0062	7.69231	92	1.58	206	73.6	6.25	5.75	35.7282
2012	Pontevedra	2180	14	2	Z002E0082	0	92	2.72	194	52.75	8	9	27.1907
2012	Pontevedra	2181	14	2	Z002E0007	0	90	2.23	159	17.25	8	8.2	10.8491
2012	Pontevedra	2182	14	2	Z002E0110	0	94	2.64	157	15.8	8.8	9	10.0637
2011	Pontevedra	1001	1	1	Z002E0192	14.3	84	4.09	208.75	33.3	8.3	6.7	15.9521
2011	Pontevedra	1002	1	1	Z002E0025	0	84	3.01	213	35.2	7.8	4.8	16.5258
2011	Pontevedra	1003	1	1	Z002E0158	27.3	84	4.61	185	31.8	7.8	1.6	17.1892
2011	Pontevedra	1004	1	1	Z002E0133	58.3	82	6.17	179	28.3	8	6.6	15.8101
2011	Pontevedra	1005	1	1	Z002E0032	15.4	81	1.56	210	81.2	8.8	3.4	38.6667
2011	Pontevedra	1006	1	1	Z002E0057	14.3	83	3.75	226	50.8	8.4	7.8	22.4779
2011	Pontevedra	1007	1	1	Z002E0165	50	85	0.92	229	87	8.6	2.8	37.9913
2011	Pontevedra	1008	1	1	Z002E0084	16.7	86	5.13	248	54.8	8.8	7.4	22.0968
2011	Pontevedra	1009	1	1	Z002E0070	0	91	8.02	258	34	7.6	6.6	13.1783
2011	Pontevedra	1010	1	1	Z002E0043	16.7	90	2.55	186	75.2	6.8	4.8	40.4301
2011	Pontevedra	1011	1	1	Z002E0174	7.7	82	15.3	266	43.2	8	8	16.2406
2011	Pontevedra	1012	1	1	Z002E0103	80	86	2.82	173	13.6	8.2	7.4	7.8613
2011	Pontevedra	1013	1	1	Z002E0053	0	85	3.04	260	23.3	8.7	9	8.9615
2011	Pontevedra	1014	1	1	Z002E0009	0	85	9.63	256	47.8	8.8	9	18.6719
2011	Pontevedra	1015	2	1	Z002E0037	36.4	82	9.07	263	55.5	8.8	6	21.1027
2011	Pontevedra	1016	2	1	Z002E0005	23.1	84	8.22	214	35	8.4	9	16.3551
2011	Pontevedra	1017	2	1	Z002E0012	55.6	84	9.34	221	24.8	8.2	8.8	11.2217
2011	Pontevedra	1018	2	1	Z002E0042	8.3	81	5.36	221	40	8.4	7.2	18.0995
2011	Pontevedra	1019	2	1	Z002E0109	90.9	83	4.23	224	32.2	6.8	5.5	14.375
2011	Pontevedra	1020	2	1	Z002E0196	85.7	85	3.37	200	31.7	8.4	7.4	15.85
2011	Pontevedra	1021	2	1	Z002E0170	63.6	83	7.73	227	71.4	8.6	9	31.4537
2011	Pontevedra	1022	2	1	Z002E0185	92.3	86	7.81	200	34.5	6.8	5.2	17.25
2011	Pontevedra	1023	2	1	Z002E0092	91.7	82	4.36	182	47.8	7.4	6.2	26.2637
2011	Pontevedra	1024	2	1	Z002E0132	0	84	7.6	236	37	8.8	9	15.678
2011	Pontevedra	1025	2	1	Z002E0095	8.3	81	9.2	229	46.8	9	9	20.4367
2011	Pontevedra	1026	2	1	Z002E0050	30.8	81	8.54	199	44	8	6	22.1106
2011	Pontevedra	1027	2	1	Z002E0122	25	86	5.82	205	56.8	8.6	7.2	27.7073
2011	Pontevedra	1028	2	1	Z002E0114	9.1	91	6.15	199	64	9	9	32.1608
2011	Pontevedra	1029	3	1	Z002E0105	7.7	85	8.07	206	37.6	8.6	8.6	18.2524
2011	Pontevedra	1030	3	1	Z002E0074	70	85	5.96	221	43.8	9	9	19.819
2011	Pontevedra	1031	3	1	Z002E0062	30.8	84	6.39	189	29.4	8.4	8.4	15.5556
2011	Pontevedra	1032	3	1	Z002E0145	18.2	85	5.89	215	44	8.6	7.6	20.4651
2011	Pontevedra	1033	3	1	Z002E0108	50	82	5.83	206	59.4	8.4	7	28.835
2011	Pontevedra	1034	3	1	Z002E0064	54.5	84	4.97	211.25	65.6	7.8	5.8	31.0533
2011	Pontevedra	1035	3	1	Z002E0014	0	85	8.4	199	45	9	5.2	22.6131
2011	Pontevedra	1036	3	1	Z002E0271	0	92	.	200	69.7	.	.	34.85
2011	Pontevedra	1037	3	1	Z002E0044	23.1	85	9.88	228	46.3	8	2.2	20.307
2011	Pontevedra	1038	3	1	Z002E0051	100	85	3.86	218	39.2	8.8	9	17.9817
2011	Pontevedra	1039	3	1	Z002E0030	16.7	81	10.92	236	42.4	8	7.3	17.9661
2011	Pontevedra	1040	3	1	Z002E0008	8.3	86	11.08	239	27	8.8	9	11.2971
2011	Pontevedra	1041	3	1	Z002E0190	.	.	.	.	.	.	.	.
2011	Pontevedra	1042	3	1	Z002E0135	15.4	82	4.92	202	13.4	8	7	6.6337
2011	Pontevedra	1043	4	1	Z002E0119	23.1	85	6.2	205	49.5	8	9	24.1463
2011	Pontevedra	1044	4	1	Z002E0036	0	85	4.43	220	59.8	8.2	7.8	27.1818
2011	Pontevedra	1045	4	1	Z002E0100	11.1	89	4.81	211	46.2	8.6	9	21.8957
2011	Pontevedra	1046	4	1	Z002E0086	100	81	4.52	191	22.2	8	5.6	11.623
2011	Pontevedra	1047	4	1	Z002E0048	33.3	81	7.81	190	31.4	8.4	6.8	16.5263
2011	Pontevedra	1048	4	1	Z002E0096	46.2	85	11.37	249	55.8	8.6	9	22.4096
2011	Pontevedra	1049	4	1	Z002E0034	14.3	85	4.48	229	30.6	8.4	7	13.3624
2011	Pontevedra	1050	4	1	Z002E0164	81.8	86	6.6	213	54.5	8.4	8.4	25.5869
2011	Pontevedra	1051	4	1	CML103	90	85	9.5	209	34.6	8.2	7	16.555
2011	Pontevedra	1052	4	1	Z002E0015	9.1	83	10.67	245	40.3	8.8	7.2	16.449
2011	Pontevedra	1053	4	1	Z002E0002	84.6	83	8.94	238	24.4	8	8.8	10.2521
2011	Pontevedra	1054	4	1	Z002E0124	46.2	85	8.75	234	49	9	8.4	20.9402
2011	Pontevedra	1055	4	1	Z002E0056	45.5	82	7.48	196	43.5	8	7	22.1939
2011	Pontevedra	1056	4	1	Z002E0173	40	81	4.18	197.5	50.2	8.2	7.2	25.4177
2011	Pontevedra	1057	5	1	Z002E0087	11.1	84	6.17	209	64.2	8.2	7	30.7177
2011	Pontevedra	1058	5	1	CML103	62.5	87	9.23	235	16.2	8.2	5.6	6.8936
2011	Pontevedra	1059	5	1	Z002E0157	80	83	7.23	187	25.2	8	6	13.4759
2011	Pontevedra	1060	5	1	Z002E0130	16.7	87	9.93	207	27.8	8.6	7.2	13.43
2011	Pontevedra	1061	5	1	Z002E0069	81.8	83	5.19	193	24.2	8.8	9	12.5389
2011	Pontevedra	1062	5	1	Z002E0144	0	83	4.03	243	51.2	8.4	8.8	21.07
2011	Pontevedra	1063	5	1	Z002E0149	16.7	81	6.51	215	19.4	9	8.2	9.0233
2011	Pontevedra	1064	5	1	Z002E0045	0	86	5.26	207	52.6	8.4	5.6	25.4106
2011	Pontevedra	1065	5	1	Z002E0055	35.3	87	12.65	240	58.4	6.8	4.8	24.3333
2011	Pontevedra	1066	5	1	Z002E0151	50	87	2.08	228	45.6	7.4	5	20
2011	Pontevedra	1067	5	1	Z002E0083	0	85	3.7	184	28.4	8.2	4.4	15.4348
2011	Pontevedra	1068	5	1	B73	0	85	7.65	218	36.2	8.8	7	16.6055
2011	Pontevedra	1069	5	1	Z002E0183	0	83	6.47	214	57	7.8	5.8	26.6355
2011	Pontevedra	1070	5	1	Z002E0068	80	85	3.6	250	54.4	8.2	8.8	21.76
2011	Pontevedra	1071	6	1	Z002E0138	28.6	82	7.51	228	52.8	8.4	6.6	23.1579
2011	Pontevedra	1072	6	1	Z002E0154	10	81	14.73	256	50.4	8.6	9	19.6875
2011	Pontevedra	1073	6	1	Z002E0187	0	87	8.88	234	22.8	8.8	9	9.7436
2011	Pontevedra	1074	6	1	Z002E0040	80	85	2.6	211.25	30	8.4	8.2	14.2012
2011	Pontevedra	1075	6	1	Z002E0188	37.5	81	6.47	241	36.6	8.6	8	15.1867
2011	Pontevedra	1076	6	1	Z002E0136	0	82	5.22	206	29	8.2	7.6	14.0777
2011	Pontevedra	1077	6	1	Z002E0175	0	86	8.42	243	37.8	9	9	15.5556
2011	Pontevedra	1078	6	1	Z002E0028	0	89	9.98	246	32.6	8.4	8.6	13.252
2011	Pontevedra	1079	6	1	Z002E0169	18.2	87	6.35	231	28.8	9	8	12.4675
2011	Pontevedra	1080	6	1	B73	16.7	83	6.32	215	60.4	7.2	3.8	28.093
2011	Pontevedra	1081	6	1	Z002E0162	0	80	7.45	180	56.4	8.6	7.4	31.3333
2011	Pontevedra	1082	6	1	Z002E0134	36.4	83	3.64	189	17	8.6	6.4	8.9947
2011	Pontevedra	1083	6	1	Z002E0041	8.3	88	6.71	212	37.3	8.5	7.5	17.5943
2011	Pontevedra	1084	6	1	Z002E0077	0	86	1.38	202	74.8	7.6	4	37.0297
2011	Pontevedra	1085	7	1	Z002E0118	18.2	85	7.37	235	49	7	5	20.8511
2011	Pontevedra	1086	7	1	Z002E0082	8.3	83	6.47	223	66.3	8.2	6.8	29.7309
2011	Pontevedra	1087	7	1	Z002E0052	0	82	7.21	242	53.2	7.8	8.4	21.9835
2011	Pontevedra	1088	7	1	Z002E0046	27.3	83	8.66	202	51.6	8.4	9	25.5446
2011	Pontevedra	1089	7	1	Z002E0198	33.3	85	4.25	183	58.3	8.8	5.8	31.8579
2011	Pontevedra	1090	7	1	Z002E0003	18.2	84	4.29	179	46	9	7.8	25.6983
2011	Pontevedra	1091	7	1	Z002E0061	50	85	3.36	178	17.8	8.8	7.2	10
2011	Pontevedra	1092	7	1	B73	0	84	6.69	215	65	8.6	7.8	30.2326
2011	Pontevedra	1093	7	1	Z002E0094	50	82	4.7	201	50.4	8.4	5.8	25.0746
2011	Pontevedra	1094	7	1	Z002E0189	18.2	89	6.44	203	14.8	8.4	8.4	7.2906
2011	Pontevedra	1095	7	1	Z002E0033	7.1	87	7.33	228	47.6	8	7	20.8772
2011	Pontevedra	1096	7	1	Z002E0066	37.5	98	1.63	219	29.6	7.6	5.6	13.516
2011	Pontevedra	1097	7	1	Z002E0129	30	82	4.89	194	44.8	8.8	6	23.0928
2011	Pontevedra	1098	7	1	Z002E0029	18.2	85	5.41	189	29	7.6	8.8	15.3439
2011	Pontevedra	1099	8	1	Z002E0186	0	87	4.1	165	39.2	7.2	5.6	23.7576
2011	Pontevedra	1100	8	1	Z002E0156	8.3	89	5.22	184	56.2	7	7.8	30.5435
2011	Pontevedra	1101	8	1	Z002E0091	16.7	85	2.67	212	43.6	8.4	7.4	20.566
2011	Pontevedra	1102	8	1	Z002E0191	100	85	7.16	246	29.8	9	8.8	12.1138
2011	Pontevedra	1103	8	1	Z002E0010	63.6	84	6.66	218	31.8	9	8.5	14.5872
2011	Pontevedra	1104	8	1	Z002E0116	63.6	84	8.93	253	47.3	8.7	9	18.6957
2011	Pontevedra	1105	8	1	Z002E0098	7.1	87	9.16	234	57.4	8.6	9	24.5299
2011	Pontevedra	1106	8	1	Z002E0085	66.7	83	2.32	184	62	8	5.6	33.6957
2011	Pontevedra	1107	8	1	Z002E0179	50	83	5.78	205	59.8	9	8.8	29.1707
2011	Pontevedra	1108	8	1	Z002E0128	25	85	6.28	257	78.8	7.6	4.6	30.6615
2011	Pontevedra	1109	8	1	Z002E0013	0	87	2.7	167.5	24	8.3	5.3	14.3284
2011	Pontevedra	1110	8	1	Z002E0107	69.2	84	8.69	242	36.2	8.8	9	14.9587
2011	Pontevedra	1111	8	1	Z002E0159	8.3	87	5.23	235	81	7	7	34.4681
2011	Pontevedra	1112	8	1	Z002E0065	9.1	87	6.65	215	46.6	8.8	9	21.6744
2011	Pontevedra	1113	9	1	Z002E0060	0	83	1.8	168	42.6	8.4	6.3	25.3571
2011	Pontevedra	1114	9	1	Z002E0147	6.7	82	1.76	234	32.2	8.8	9	13.7607
2011	Pontevedra	1115	9	1	Z002E0016	23.1	83	7.37	197	34.8	8.8	8.6	17.665
2011	Pontevedra	1116	9	1	Z002E0075	16.7	89	4.24	183	35	8	5.6	19.1257
2011	Pontevedra	1117	9	1	Z002E0113	10	85	6.3	244	41.4	8.4	8	16.9672
2011	Pontevedra	1118	9	1	Z002E0039	8.3	82	4.48	188	65.2	7.8	6	34.6809
2011	Pontevedra	1119	9	1	Z002E0022	30	88	4.86	248	67	7.8	3.2	27.0161
2011	Pontevedra	1120	9	1	Z002E0112	30.8	89	6.05	247	90.5	8	5.4	36.6397
2011	Pontevedra	1121	9	1	Z002E0110	30	87	12.07	238	45.8	8.2	7.2	19.2437
2011	Pontevedra	1122	9	1	Z002E0120	0	89	5.62	208	26.6	8.6	8.4	12.7885
2011	Pontevedra	1123	9	1	Z002E0123	23.1	83	5.39	216	45.8	7.8	7.4	21.2037
2011	Pontevedra	1124	9	1	Z002E0127	9.1	84	7.09	264	35.3	8.4	9	13.3712
2011	Pontevedra	1125	9	1	Z002E0117	61.5	88	10.81	246	90.4	8.6	9	36.748
2011	Pontevedra	1126	9	1	Z002E0199	7.1	81	8.76	202	28.2	8.6	7.2	13.9604
2011	Pontevedra	1127	10	1	Z002E0038	37.5	88	5.46	223	41.4	8.3	7	18.565
2011	Pontevedra	1128	10	1	Z002E0078	20	80	6.16	194	26.2	8.8	8	13.5052
2011	Pontevedra	1129	10	1	Z002E0111	9.1	86	5.76	238	20.8	8.8	7.6	8.7395
2011	Pontevedra	1130	10	1	Z002E0140	33.3	87	6.31	216	28.6	8.2	7.6	13.2407
2011	Pontevedra	1131	10	1	Z002E0004	0	84	6.6	227	42.5	9	9	18.7225
2011	Pontevedra	1132	10	1	Z002E0001	0	86	3.16	208.333	44.5	8.7	9	21.36
2011	Pontevedra	1133	10	1	Z002E0143	9.1	91	6.87	221	60	8.2	7.8	27.1493
2011	Pontevedra	1134	10	1	Z002E0081	10	91	5.29	211	50.8	7.8	6.4	24.0758
2011	Pontevedra	1135	10	1	Z002E0023	18.2	84	8.3	231	35.2	8.4	7.8	15.2381
2011	Pontevedra	1136	10	1	Z002E0153	0	88	5.29	267.5	54.8	9	9	20.486
2011	Pontevedra	1137	10	1	Z002E0137	25	83	11.28	210	38.4	9	9	18.2857
2011	Pontevedra	1138	10	1	Z002E0178	0	85	3.83	190	39.2	6.4	6.5	20.6316
2011	Pontevedra	1139	10	1	Z002E0195	18.2	89	4.83	231	35.6	8.6	5.8	15.4113
2011	Pontevedra	1140	10	1	Z002E0184	38.5	83	11.26	224	45.4	8.4	7.2	20.2679
2011	Pontevedra	1141	11	1	Z002E0200	0	81	6.49	188	57	9	9	30.3191
2011	Pontevedra	1142	11	1	Z002E0093	8.3	82	3.13	198	69.2	6.8	6.2	34.9495
2011	Pontevedra	1143	11	1	Z002E0155	25	89	6.54	190	48.3	8	8.5	25.4211
2011	Pontevedra	1144	11	1	Z002E0018	0	81	5.29	206	48.4	7.4	6.8	23.4951
2011	Pontevedra	1145	11	1	Z002E0146	0	85	5.92	235	63.2	8.6	9	26.8936
2011	Pontevedra	1146	11	1	Z002E0125	38.5	89	5.95	221	59.5	8.8	7.2	26.9231
2011	Pontevedra	1147	11	1	Z002E0197	38.5	83	7.58	211	48.8	8.8	9	23.128
2011	Pontevedra	1148	11	1	Z002E0080	0	84	6.49	217	48.2	7.8	8	22.212
2011	Pontevedra	1149	11	1	Z002E0142	20	80	13.29	266	62.8	9	8.4	23.609
2011	Pontevedra	1150	11	1	Z002E0071	0	89	1.17	205	54.6	8.6	6	26.6341
2011	Pontevedra	1151	11	1	Z002E0101	41.7	85	5.92	206	50.8	8.6	6	24.6602
2011	Pontevedra	1152	11	1	Z002E0166	7.1	85	7.68	195	53.6	7.8	4.2	27.4872
2011	Pontevedra	1153	11	1	Z002E0168	20	88	7.03	237	49.8	8.8	9	21.0127
2011	Pontevedra	1154	11	1	Z002E0031	60	81	5.29	206	44.8	9	7.8	21.7476
2011	Pontevedra	1155	12	1	Z002E0163	66.7	81	7.78	243	34.8	9	8	14.321
2011	Pontevedra	1156	12	1	Z002E0139	0	91	4.19	242	51.2	7	8.4	21.157
2011	Pontevedra	1157	12	1	Z002E0148	7.7	83	16.08	252	42	8.8	9	16.6667
2011	Pontevedra	1158	12	1	Z002E0007	80	83	4.32	189	26.4	8.6	6.4	13.9683
2011	Pontevedra	1159	12	1	Z002E0011	40	82	5.65	194	61.8	8.2	9	31.8557
2011	Pontevedra	1160	12	1	Z002E0058	44.4	85	1.87	159	41.7	8.6	8.6	26.2264
2011	Pontevedra	1161	12	1	Z002E0047	15.4	83	7.99	241	76.3	8.6	6.4	31.6598
2011	Pontevedra	1162	12	1	Z002E0131	53.8	85	6.55	219	66.2	8.3	5.3	30.2283
2011	Pontevedra	1163	12	1	Z002E0193	62.5	83	8.16	191	50	9	8.8	26.178
2011	Pontevedra	1164	12	1	Z002E0194	7.7	89	8.02	226	89.2	8	8.7	39.469
2011	Pontevedra	1165	12	1	Z002E0141	54.5	83	6.38	220	57.6	8.5	7	26.1818
2011	Pontevedra	1166	12	1	Z002E0171	15.4	83	5.96	234	65	9	9	27.7778
2011	Pontevedra	1167	12	1	Z002E0090	22.2	80	4.55	200	65.6	8.2	8.2	32.8
2011	Pontevedra	1168	12	1	Z002E0076	30	85	7.14	201	76.8	8.4	8.2	38.209
2011	Pontevedra	1169	13	1	Z002E0167	0	82	5.2	188	44.4	9	8.8	23.617
2011	Pontevedra	1170	13	1	Z002E0020	0	82	5.35	210	46.6	8.2	5.6	22.1905
2011	Pontevedra	1171	13	1	Z002E0104	38.5	87	4.36	192	50.6	8.4	7.2	26.3542
2011	Pontevedra	1172	13	1	Z002E0006	0	89	1.83	244	64.2	9	9	26.3115
2011	Pontevedra	1173	13	1	Z002E0079	61.5	86	4.22	175	36.8	8.8	8.4	21.0286
2011	Pontevedra	1174	13	1	Z002E0072	91.7	83	2.58	189	37.2	8.2	9	19.6825
2011	Pontevedra	1175	13	1	Z002E0150	60	83	3.66	191	42.6	8	6	22.3037
2011	Pontevedra	1176	13	1	Z002E0160	27.3	82	12.28	261	62.2	8.8	7.6	23.8314
2011	Pontevedra	1177	13	1	Z002E0059	41.7	82	5.62	218	52.2	8.2	6.8	23.945
2011	Pontevedra	1178	13	1	Z002E0161	100	85	6.35	249	86.3	8.4	4	34.6586
2011	Pontevedra	1179	13	1	Z002E0021	16.7	83	9.72	252	60	9	7.4	23.8095
2011	Pontevedra	1180	13	1	Z002E0121	15.4	85	6.3	222	76.8	9	5	34.5946
2011	Pontevedra	1181	13	1	Z002E0182	38.5	82	10.51	246	70	8.6	6.6	28.4553
2011	Pontevedra	1182	13	1	Z002E0049	27.3	86	5.02	202	64.2	7.3	6.8	31.7822
2011	Pontevedra	1183	14	1	Z002E0017	25	86	3.99	236	53.6	8.8	9	22.7119
2011	Pontevedra	1184	14	1	Z002E0063	100	85	5.78	248	53.7	7.8	4.2	21.6532
2011	Pontevedra	1185	14	1	CML103	90.9	88	8.26	228	24.2	8	7.6	10.614
2011	Pontevedra	1186	14	1	Z002E0106	100	88	.	210	25	8	8.3	11.9048
2011	Pontevedra	1187	14	1	Z002E0180	54.5	81	7.85	218	48.6	8.8	7.6	22.2936
2011	Pontevedra	1188	14	1	Z002E0073	38.5	85	7.02	211	23	7.8	7.4	10.9005
2011	Pontevedra	1189	14	1	Z002E0102	27.3	81	6.92	216	27.8	8.8	8.5	12.8704
2011	Pontevedra	1190	14	1	Z002E0172	0	84	7.89	239	15.8	8.2	8.8	6.6109
2011	Pontevedra	1191	14	1	Z002E0097	18.2	83	4.53	192	44.2	7.6	3.2	23.0208
2011	Pontevedra	1192	14	1	Z002E0152	9.1	83	8.35	201	33.2	8.8	8.6	16.5174
2011	Pontevedra	1193	14	1	Z002E0176	46.2	83	7.1	241	48.8	7.6	6.8	20.249
2011	Pontevedra	1194	14	1	Z002E0088	50	83	6.81	208	21.3	8.8	8.8	10.2404
2011	Pontevedra	1195	14	1	Z002E0019	18.2	89	8.05	226	39.6	8.8	8.4	17.5221
2011	Pontevedra	1196	14	1	Z002E0181	16.7	85	7.83	233	58.6	8.2	6	25.1502
2011	Pontevedra	2001	1	2	Z002E0022	16.7	89	5.14	254	42.2	8.6	4.2	16.6142
2011	Pontevedra	2002	1	2	B73	0	82	6.5	217	52.4	8.4	7.4	24.1475
2011	Pontevedra	2003	1	2	Z002E0134	41.7	82	17.07	197	7.8	8.6	7.6	3.9594
2011	Pontevedra	2004	1	2	Z002E0098	7.7	87	7.19	246	44.4	8.4	4.5	18.0488
2011	Pontevedra	2005	1	2	Z002E0056	16.7	83	6.08	207	67	7.5	6.5	32.3671
2011	Pontevedra	2006	1	2	Z002E0053	0	86	4.9	282	86.2	7.6	4.5	30.5674
2011	Pontevedra	2007	1	2	Z002E0172	0	84	7.81	259	43.4	6.6	7.2	16.7568
2011	Pontevedra	2008	1	2	Z002E0006	23.1	89	4.76	264	51.4	8.2	6.3	19.4697
2011	Pontevedra	2009	1	2	Z002E0166	16.7	85	2.56	196	33.4	8.8	7.2	17.0408
2011	Pontevedra	2010	1	2	Z002E0008	20	86	12.84	259	35.2	8.8	8.2	13.5907
2011	Pontevedra	2011	1	2	Z002E0171	7.7	83	10.03	265	33	9	7	12.4528
2011	Pontevedra	2012	1	2	Z002E0183	0	83	7.35	230	53.6	8.6	7.6	23.3043
2011	Pontevedra	2013	1	2	Z002E0196	81.8	83	5.3	231	25.8	8.2	7.4	11.1688
2011	Pontevedra	2014	1	2	Z002E0081	0	89	10.06	230	38	8.2	7.6	16.5217
2011	Pontevedra	2015	2	2	Z002E0133	14.3	83	7.98	193	55.5	8.6	9	28.7565
2011	Pontevedra	2016	2	2	Z002E0029	7.7	81	7.08	196	32.2	8	6.4	16.4286
2011	Pontevedra	2017	2	2	Z002E0040	50	85	5.08	228	35.2	8.4	9	15.4386
2011	Pontevedra	2018	2	2	Z002E0016	9.1	82	6.91	224	39.8	8.4	8.2	17.7679
2011	Pontevedra	2019	2	2	CML103	22.2	89	5.64	226	23.2	8.2	8.8	10.2655
2011	Pontevedra	2020	2	2	Z002E0014	7.1	83	6.98	217	66.8	9	6.4	30.7834
2011	Pontevedra	2021	2	2	Z002E0139	0	87	8.89	256	52.4	8.2	7	20.4688
2011	Pontevedra	2022	2	2	Z002E0049	10	91	0.44	182	43	6.3	4.7	23.6264
2011	Pontevedra	2023	2	2	Z002E0181	36.4	85	9.11	245	64	8.6	7.6	26.1224
2011	Pontevedra	2024	2	2	Z002E0140	9.1	87	6.97	224	38.8	8.2	7	17.3214
2011	Pontevedra	2025	2	2	Z002E0124	14.3	88	4.21	240	56.4	8.6	6.6	23.5
2011	Pontevedra	2026	2	2	Z002E0065	0	89	4.83	234	45	8.2	9	19.2308
2011	Pontevedra	2027	2	2	Z002E0042	30.8	84	7.75	212	25	8.6	8.8	11.7925
2011	Pontevedra	2028	2	2	Z002E0031	0	85	7.37	207	47.4	8	6.6	22.8986
2011	Pontevedra	2029	3	2	Z002E0045	0	80	6.81	211	48.4	7.8	5.6	22.9384
2011	Pontevedra	2030	3	2	Z002E0086	100	81	4.49	198	33	7.6	4.6	16.6667
2011	Pontevedra	2031	3	2	Z002E0057	12.5	88	5.63	237	57.8	9	9	24.3882
2011	Pontevedra	2032	3	2	Z002E0010	8.3	83	8.09	205	41.2	8	8.2	20.0976
2011	Pontevedra	2033	3	2	Z002E0200	0	81	9.03	209	72.4	7.6	7.4	34.6411
2011	Pontevedra	2034	3	2	Z002E0062	90	83	2.49	172	53.3	7.8	9	30.9884
2011	Pontevedra	2035	3	2	Z002E0004	23.1	83	8.45	225	50.8	8.4	6.6	22.5778
2011	Pontevedra	2036	3	2	Z002E0163	100	82	6.28	239	80.2	8.2	5.8	33.5565
2011	Pontevedra	2037	3	2	Z002E0077	20	82	2.49	208.75	58.2	8.6	8.8	27.8802
2011	Pontevedra	2038	3	2	Z002E0061	40	85	6.79	203	39.2	7.6	6	19.3103
2011	Pontevedra	2039	3	2	Z002E0182	0	85	11.02	212	59	8.8	8.6	27.8302
2011	Pontevedra	2040	3	2	Z002E0123	60	83	3.22	174	50.8	6.8	7	29.1954
2011	Pontevedra	2041	3	2	Z002E0037	36.4	85	6.26	207	39.6	7.4	3.6	19.1304
2011	Pontevedra	2042	3	2	Z002E0017	40	89	5.01	214	36.8	8	9	17.1963
2011	Pontevedra	2043	4	2	Z002E0046	0	83	9.53	199	67.6	8.8	5.4	33.9698
2011	Pontevedra	2044	4	2	Z002E0064	20	88	2.9	231.25	76.8	8.5	6.8	33.2108
2011	Pontevedra	2045	4	2	Z002E0116	33.3	85	10.69	247	104	7.2	5.4	42.1053
2011	Pontevedra	2046	4	2	Z002E0152	55.6	82	7.27	205	28.4	8.4	9	13.8537
2011	Pontevedra	2047	4	2	Z002E0137	25	84	8.22	217	51.5	8.2	5.4	23.7327
2011	Pontevedra	2048	4	2	Z002E0194	28.6	87	9.92	256	47.8	9	9	18.6719
2011	Pontevedra	2049	4	2	Z002E0071	16.7	89	1.05	230	62.6	8.3	1.3	27.2174
2011	Pontevedra	2050	4	2	Z002E0121	30.8	84	5.13	224	58.8	7.8	8.8	26.25
2011	Pontevedra	2051	4	2	Z002E0028	16.7	90	8.93	257	24.8	9	9	9.6498
2011	Pontevedra	2052	4	2	Z002E0117	76.9	89	7.1	243	24	8.2	6.6	9.8765
2011	Pontevedra	2053	4	2	Z002E0055	8.3	88	7.19	235	42.4	9	9	18.0426
2011	Pontevedra	2054	4	2	Z002E0034	0	88	3.91	224	38.6	8.6	8	17.2321
2011	Pontevedra	2055	4	2	Z002E0109	64.3	86	4.91	240	43.8	8.8	7.4	18.25
2011	Pontevedra	2056	4	2	Z002E0165	23.1	83	2.6	247	55.5	9	7	22.4696
2011	Pontevedra	2057	5	2	Z002E0150	44.4	83	6.51	239	67.6	7.4	6.6	28.2845
2011	Pontevedra	2058	5	2	Z002E0070	7.1	93	6.71	267	80.8	7.2	8.3	30.2622
2011	Pontevedra	2059	5	2	Z002E0114	7.7	87	8.71	240	57.8	8.8	6.8	24.0833
2011	Pontevedra	2060	5	2	Z002E0019	36.4	89	6.25	256	55	8.4	8	21.4844
2011	Pontevedra	2061	5	2	Z002E0145	9.1	88	4.76	234	44.6	7.4	4.8	19.0598
2011	Pontevedra	2062	5	2	Z002E0023	0	85	3.01	215	28.2	6.6	7.4	13.1163
2011	Pontevedra	2063	5	2	Z002E0169	0	86	9.56	234	54.8	8.8	9	23.4188
2011	Pontevedra	2064	5	2	Z002E0085	18.2	82	6.29	220	42.2	9	6	19.1818
2011	Pontevedra	2065	5	2	Z002E0157	69.2	85	4.07	208	31.6	6.8	1.4	15.1923
2011	Pontevedra	2066	5	2	Z002E0076	23.1	85	10.85	253	78.2	8.6	5.6	30.9091
2011	Pontevedra	2067	5	2	Z002E0033	23.1	83	8.97	247	78.2	8	7	31.6599
2011	Pontevedra	2068	5	2	Z002E0093	0	83	5.1	214	67	8.8	8.8	31.3084
2011	Pontevedra	2069	5	2	Z002E0164	9.1	89	5.69	237	61.3	8.2	7.2	25.865
2011	Pontevedra	2070	5	2	Z002E0039	0	82	4.69	179	45.8	7.4	8.3	25.5866
2011	Pontevedra	2071	6	2	Z002E0043	28.6	93	0.74	198	47.6	7.8	6.4	24.0404
2011	Pontevedra	2072	6	2	Z002E0011	10	83	4.02	191	38.5	5.6	4	20.1571
2011	Pontevedra	2073	6	2	Z002E0184	40	84	10.93	223	54.2	8.6	4.6	24.3049
2011	Pontevedra	2074	6	2	Z002E0002	9.1	83	7.32	230	51.4	8.8	6.5	22.3478
2011	Pontevedra	2075	6	2	Z002E0129	7.1	82	6.21	195	34.6	8.6	7.4	17.7436
2011	Pontevedra	2076	6	2	Z002E0087	0	85	7.81	229	60.2	9	8.6	26.2882
2011	Pontevedra	2077	6	2	Z002E0146	0	84	3.12	250	71.4	7.2	8.6	28.56
2011	Pontevedra	2078	6	2	Z002E0063	66.7	82	6.93	227	61.6	6.4	5.2	27.1366
2011	Pontevedra	2079	6	2	Z002E0138	45.5	82	3.79	211	68.6	8.2	8.2	32.5118
2011	Pontevedra	2080	6	2	Z002E0160	8.3	82	13.84	268	73	8	4.8	27.2388
2011	Pontevedra	2081	6	2	Z002E0075	25	89	5.15	192	44.8	8.8	4.8	23.3333
2011	Pontevedra	2082	6	2	Z002E0191	53.8	83	8.58	239	40.2	8.2	4.4	16.8201
2011	Pontevedra	2083	6	2	Z002E0074	66.7	86	2.83	234	60	7.2	7.2	25.641
2011	Pontevedra	2084	6	2	Z002E0185	77.8	80	5.61	212	22.3	9	9	10.5189
2011	Pontevedra	2085	7	2	Z002E0170	100	85	6.18	237	85	8	6	35.865
2011	Pontevedra	2086	7	2	Z002E0107	33.3	82	11.42	253	80.6	8.6	7.2	31.8577
2011	Pontevedra	2087	7	2	Z002E0195	33.3	89	2.68	231	68.3	8.2	9	29.5671
2011	Pontevedra	2088	7	2	Z002E0066	27.3	87	6.21	238	67.6	7.6	7.4	28.4034
2011	Pontevedra	2089	7	2	Z002E0100	20	84	6.63	235	38.2	8.8	9	16.2553
2011	Pontevedra	2090	7	2	Z002E0192	87.5	82	5.85	223	28.8	9	9	12.9148
2011	Pontevedra	2091	7	2	Z002E0271	33.3	84	.	186.667	64.7	6.3	6.3	34.6607
2011	Pontevedra	2092	7	2	Z002E0136	0	91	2.24	179	57.8	7.2	6.8	32.2905
2011	Pontevedra	2093	7	2	Z002E0142	15.4	80	15.03	270	72.6	8	7.6	26.8889
2011	Pontevedra	2094	7	2	Z002E0199	0	83	6.14	190	58.8	8.6	9	30.9474
2011	Pontevedra	2095	7	2	B73	14.3	82	5.93	219	58.8	8	5.8	26.8493
2011	Pontevedra	2096	7	2	Z002E0088	71.4	85	3.56	190	42.3	8.8	9	22.2632
2011	Pontevedra	2097	7	2	Z002E0058	9.1	85	4.61	160	45.3	8	4	28.3125
2011	Pontevedra	2098	7	2	Z002E0104	27.3	89	4.65	157	43.5	8.8	7.8	27.707
2011	Pontevedra	2099	8	2	Z002E0149	12.5	85	3.12	165	45.2	7.8	6	27.3939
2011	Pontevedra	2100	8	2	Z002E0001	50	84	4.25	191	49.6	8.8	5.6	25.9686
2011	Pontevedra	2101	8	2	Z002E0158	75	87	3.46	152	44.2	5.6	3.6	29.0789
2011	Pontevedra	2102	8	2	Z002E0048	22.2	83	4.19	166	46.8	8.6	7.8	28.1928
2011	Pontevedra	2103	8	2	Z002E0161	25	82	5.44	225	55.8	8.6	7.8	24.8
2011	Pontevedra	2104	8	2	Z002E0030	18.2	83	7.33	212	67.6	7.8	8	31.8868
2011	Pontevedra	2105	8	2	Z002E0118	7.7	84	8.78	247	63.8	8.2	8	25.83
2011	Pontevedra	2106	8	2	Z002E0091	30.8	86	2.28	202	52	7	7	25.7426
2011	Pontevedra	2107	8	2	Z002E0131	60	87	4.33	236	48	8.6	7	20.339
2011	Pontevedra	2108	8	2	Z002E0122	0	85	3.49	228.75	85.4	7.6	8.4	37.3333
2011	Pontevedra	2109	8	2	Z002E0154	66.7	83	11.41	232	26.8	8.8	9	11.5517
2011	Pontevedra	2110	8	2	Z002E0180	100	80	5.63	217	43.6	8.6	8.8	20.0922
2011	Pontevedra	2111	8	2	Z002E0127	14.3	86	6.62	242	42.4	8.4	7.4	17.5207
2011	Pontevedra	2112	8	2	Z002E0080	18.2	85	5.69	224	58.4	7.6	4.2	26.0714
2011	Pontevedra	2113	9	2	Z002E0003	0	81	4.31	185	69	8.4	4	37.2973
2011	Pontevedra	2114	9	2	Z002E0130	0	88	7.28	193	37.5	8.2	7.6	19.4301
2011	Pontevedra	2115	9	2	Z002E0168	53.8	85	8.98	248	65.4	9	7.8	26.371
2011	Pontevedra	2116	9	2	Z002E0105	9.1	83	5.02	218	66.4	7.4	8.2	30.4587
2011	Pontevedra	2117	9	2	Z002E0128	0	85	5.44	245	71.6	7.4	7.2	29.2245
2011	Pontevedra	2118	9	2	Z002E0188	20	86	4.05	220	37.2	8.2	7.6	16.9091
2011	Pontevedra	2119	9	2	Z002E0119	0	83	6.76	217	68.4	8.6	8.2	31.5207
2011	Pontevedra	2120	9	2	Z002E0032	0	83	4.31	222	74.6	7.2	6.8	33.6036
2011	Pontevedra	2121	9	2	Z002E0176	41.7	82	7.75	245	47.6	8.4	9	19.4286
2011	Pontevedra	2122	9	2	Z002E0050	7.7	81	8.51	202	42.4	8.6	7.4	20.9901
2011	Pontevedra	2123	9	2	Z002E0038	33.3	87	4.98	238	59.4	8	6.6	24.958
2011	Pontevedra	2124	9	2	Z002E0072	100	85	2.08	191	36.6	8.2	9	19.1623
2011	Pontevedra	2125	9	2	Z002E0147	0	79	14.25	217	47	9	7.6	21.659
2011	Pontevedra	2126	9	2	Z002E0047	0	81	8.78	246	36.6	8	7	14.878
2011	Pontevedra	2127	10	2	Z002E0113	9.1	82	6.51	249	55.8	8.8	8.6	22.4096
2011	Pontevedra	2128	10	2	Z002E0106	50	93	1.51	245	44.3	.	.	18.0816
2011	Pontevedra	2129	10	2	Z002E0012	30.8	85	11.66	224	36.6	7.8	7.2	16.3393
2011	Pontevedra	2130	10	2	Z002E0103	83.3	85	2.27	188	30.4	6.8	4.2	16.1702
2011	Pontevedra	2131	10	2	Z002E0082	7.7	82	8	215	82.6	7.8	5.8	38.4186
2011	Pontevedra	2132	10	2	Z002E0197	50	83	9.33	231	25	9	8.8	10.8225
2011	Pontevedra	2133	10	2	Z002E0021	0	85	7.82	243	51.8	8.6	4.8	21.3169
2011	Pontevedra	2134	10	2	Z002E0111	0	86	5.93	240	70.6	8.6	6.6	29.4167
2011	Pontevedra	2135	10	2	Z002E0190	.	.	.	.	.	.	.	.
2011	Pontevedra	2136	10	2	Z002E0144	33.3	85	1.51	230	72	8	6.3	31.3043
2011	Pontevedra	2137	10	2	Z002E0175	0	88	6.7	231	59.4	7.4	5.6	25.7143
2011	Pontevedra	2138	10	2	Z002E0007	61.5	81	7.97	208	21.2	8.8	7	10.1923
2011	Pontevedra	2139	10	2	Z002E0173	0	82	5.76	204	57.2	8	3.8	28.0392
2011	Pontevedra	2140	10	2	Z002E0013	0	80	2.78	192	43.6	7.3	8.3	22.7083
2011	Pontevedra	2141	11	2	Z002E0112	8.3	88	8.66	265	71.6	8.6	4	27.0189
2011	Pontevedra	2142	11	2	Z002E0084	41.7	89	5.23	235	44.2	9	8.6	18.8085
2011	Pontevedra	2143	11	2	Z002E0095	0	83	8.57	232	39.6	8.2	8.4	17.069
2011	Pontevedra	2144	11	2	Z002E0052	0	83	7.82	238	35	8.2	7	14.7059
2011	Pontevedra	2145	11	2	Z002E0178	14.3	85	7.11	200	30.8	7	8	15.4
2011	Pontevedra	2146	11	2	Z002E0187	0	89	4.81	210	35.8	8.4	8.2	17.0476
2011	Pontevedra	2147	11	2	Z002E0108	27.3	83	6.63	212	45.6	8.3	9	21.5094
2011	Pontevedra	2148	11	2	Z002E0079	9.1	85	6.19	195	48.8	8	7	25.0256
2011	Pontevedra	2149	11	2	Z002E0193	54.5	81	12.3	252	39.4	8.6	7.4	15.6349
2011	Pontevedra	2150	11	2	Z002E0018	25	82	5.62	231	41.6	9	9	18.0087
2011	Pontevedra	2151	11	2	Z002E0102	50	81	4.66	188	24.4	8.6	7.4	12.9787
2011	Pontevedra	2152	11	2	Z002E0068	0	85	3.03	203	49	7.4	7.4	24.1379
2011	Pontevedra	2153	11	2	Z002E0036	0	86	3.51	223	80.6	7.5	7.7	36.1435
2011	Pontevedra	2154	11	2	Z002E0179	33.3	81	6.39	195	62.4	8	6.8	32
2011	Pontevedra	2155	12	2	Z002E0120	0	89	1.77	178.75	27.3	9	7.7	15.2727
2011	Pontevedra	2156	12	2	CML103	18.2	86	13.26	240	30.8	9	7.2	12.8333
2011	Pontevedra	2157	12	2	Z002E0083	6.7	82	9.76	196	15	9	6.4	7.6531
2011	Pontevedra	2158	12	2	B73	50	83	5.66	217	52.6	7.4	6.2	24.2396
2011	Pontevedra	2159	12	2	Z002E0189	22.2	86	6.18	198	37	8.6	6	18.6869
2011	Pontevedra	2160	12	2	Z002E0101	63.6	85	6.65	239	20	9	9	8.3682
2011	Pontevedra	2161	12	2	Z002E0156	0	88	6.19	214	39	7.4	8.4	18.2243
2011	Pontevedra	2162	12	2	Z002E0096	10	86	9.65	268	37.8	8.8	8.6	14.1045
2011	Pontevedra	2163	12	2	Z002E0005	8.3	83	9.4	208	65.8	6.6	4.8	31.6346
2011	Pontevedra	2164	12	2	Z002E0090	11.1	81	3.58	239	60.2	8.6	7.8	25.1883
2011	Pontevedra	2165	12	2	Z002E0167	0	81	9.42	219	46	8.4	9	21.0046
2011	Pontevedra	2166	12	2	Z002E0051	87.5	86	3.57	209	35	8.4	7.4	16.7464
2011	Pontevedra	2167	12	2	Z002E0078	18.2	81	4.31	182	16.8	7.6	7.4	9.2308
2011	Pontevedra	2168	12	2	Z002E0174	0	80	17.47	259	14.4	8.8	8	5.5598
2011	Pontevedra	2169	13	2	Z002E0141	55.6	83	9.58	246	25	8.8	8.8	10.1626
2011	Pontevedra	2170	13	2	Z002E0125	8.3	85	11.06	221	32.4	8.4	8.8	14.6606
2011	Pontevedra	2171	13	2	Z002E0069	55.6	83	8.25	195	40.8	8.4	8.8	20.9231
2011	Pontevedra	2172	13	2	Z002E0198	7.1	82	7.49	204	64.6	7.6	4	31.6667
2011	Pontevedra	2173	13	2	Z002E0015	0	83	7.75	242	32.6	8.8	6	13.4711
2011	Pontevedra	2174	13	2	Z002E0009	9.1	86	6.91	228	59.4	8.6	6.8	26.0526
2011	Pontevedra	2175	13	2	Z002E0143	18.2	86	7.78	222	26.2	7.5	7	11.8018
2011	Pontevedra	2176	13	2	Z002E0162	0	81	9.83	179	54.6	8	4.8	30.5028
2011	Pontevedra	2177	13	2	Z002E0135	0	82	6.05	206	21.6	8.4	4.6	10.4854
2011	Pontevedra	2178	13	2	Z002E0097	25	83	3.93	196	42.5	6	6	21.6837
2011	Pontevedra	2179	13	2	Z002E0110	30	85	9.8	215	21.8	8.5	8.5	10.1395
2011	Pontevedra	2180	13	2	Z002E0132	25	83	7.88	217	65.4	8.2	6.8	30.1382
2011	Pontevedra	2181	13	2	Z002E0186	0	82	8.78	202	48	9	7.6	23.7624
2011	Pontevedra	2182	13	2	Z002E0020	0	82	3.89	224	48.8	8	5.2	21.7857
2011	Pontevedra	2183	14	2	Z002E0041	15.4	83	9.09	251	12.3	8.8	9	4.9004
2011	Pontevedra	2184	14	2	Z002E0059	9.1	82	7.65	208	69.3	8	3.2	33.3173
2011	Pontevedra	2185	14	2	Z002E0151	37.5	83	4.17	219	34.6	8.8	7	15.7991
2011	Pontevedra	2186	14	2	Z002E0094	0	83	3.21	180	49.6	8.4	7.6	27.5556
2011	Pontevedra	2187	14	2	Z002E0148	0	87	9.45	221	72.2	8.6	9	32.6697
2011	Pontevedra	2188	14	2	CML103	0	87	2.99	192	33.6	8	6.3	17.5
2011	Pontevedra	2189	14	2	Z002E0025	7.1	87	5.39	200	45.6	8.7	9	22.8
2011	Pontevedra	2190	14	2	Z002E0155	22.2	87	4.86	176	42.6	8.8	9	24.2045
2011	Pontevedra	2191	14	2	Z002E0044	0	89	6.68	214	65.4	8.4	5	30.5607
2011	Pontevedra	2192	14	2	Z002E0153	33.3	91	3.98	216	61.3	7	9	28.3796
2011	Pontevedra	2193	14	2	Z002E0159	0	86	6.8	218	25.4	8.2	7.4	11.6514
2011	Pontevedra	2194	14	2	Z002E0092	44.4	85	3.28	153	36.2	8.4	7.3	23.6601
2011	Pontevedra	2195	14	2	Z002E0073	20	88	5.26	191	7.3	8	7.2	3.822
2011	Pontevedra	2196	14	2	Z002E0060	0	89	.	94	35.5	5.4	4	37.766
